# Supplementary material for: Comparison of an Automated Plate Assessment System (APAS Independence) and Artificial Intelligence (AI) to Manual Plate Reading of Methicillin-Resistant and Methicillin-Susceptible Staphylococcus aureus CHROMagar Surveillance Cultures
Source: PubMed Central journal article supplement (PMC8525556; doi:10.1128/jcm.00971-21), 2021-10-19

## Supplemental Figure 1

### APAS Independence Instrument

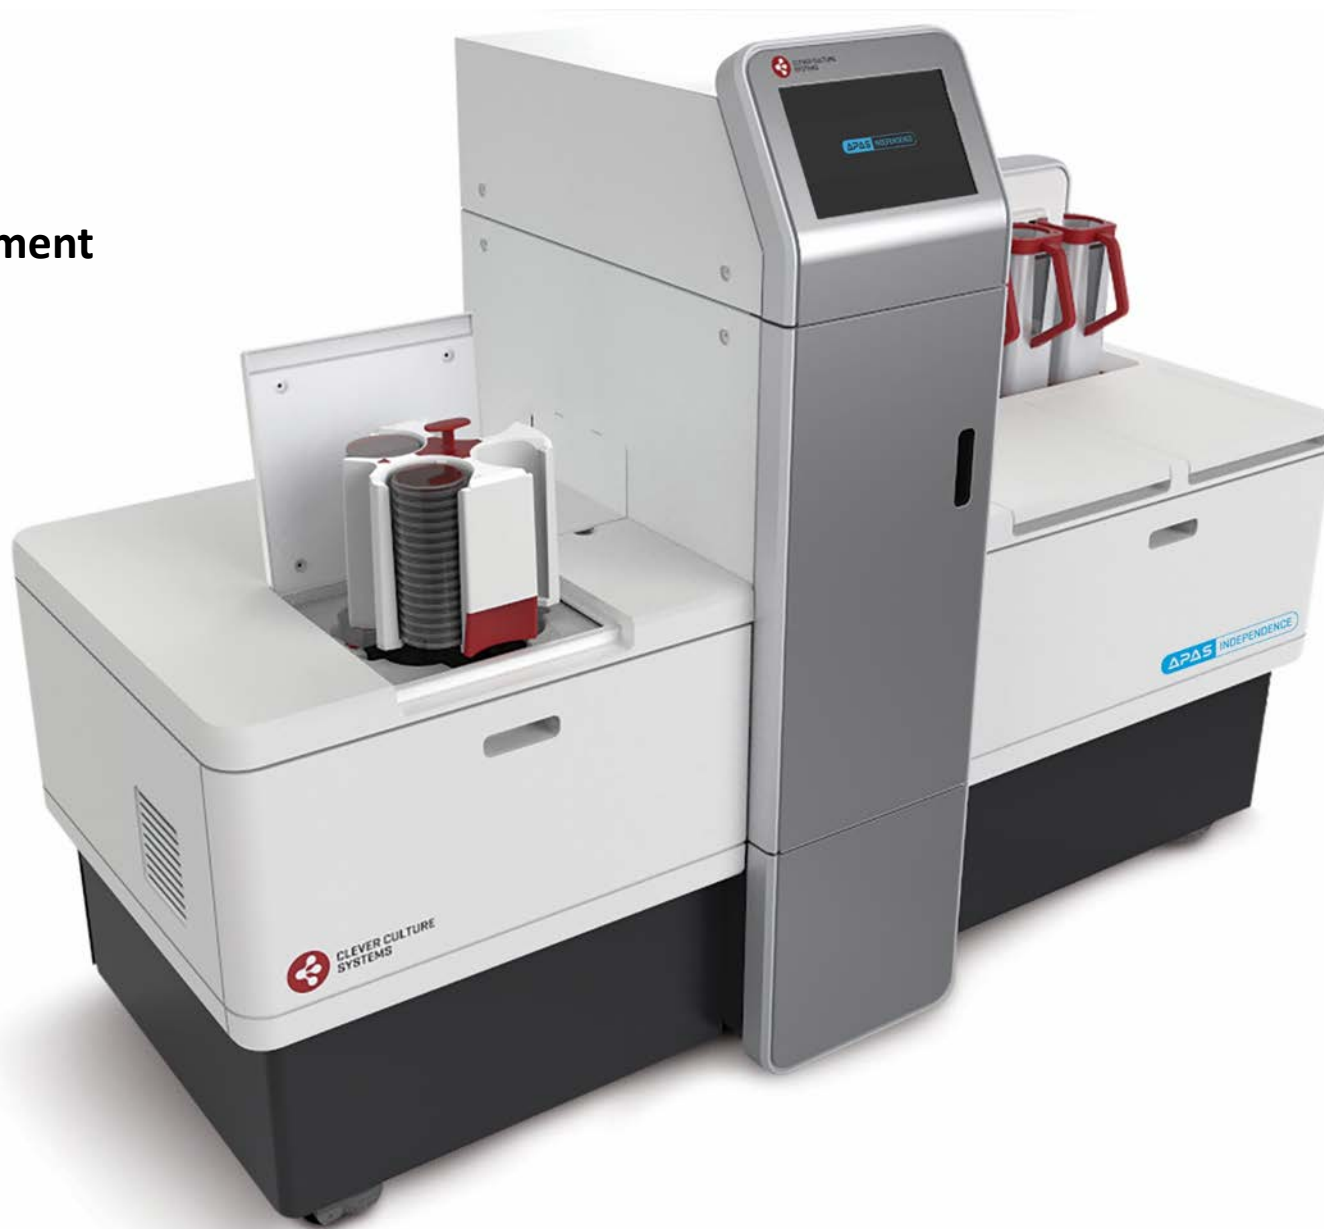

Supplement: jcm.00971-21-s0001.pdf [file jcm.00971-21-s0001.pdf]
