# Supplementary material for: Comparison of an Automated Plate Assessment System (APAS Independence) and Artificial Intelligence (AI) to Manual Plate Reading of Methicillin-Resistant and Methicillin-Susceptible Staphylococcus aureus CHROMagar Surveillance Cultures
Source: PubMed Central journal article supplement (PMC8525556; doi:10.1128/jcm.00971-21), 2021-10-19
Supplement: jcm.00971-21-s0002.pdf [file jcm.00971-21-s0002.pdf]

**Supplemental Figure 1:** Photograph of the APAS Independence Instrument
